# Supplementary material
Source: PubMed Central journal article supplement (PMC2743348)
Supplement: NIHMS83978-supplement-supplementary.pdf [file NIHMS83978-supplement-supplementary.pdf]

# Supplementary Figure 1

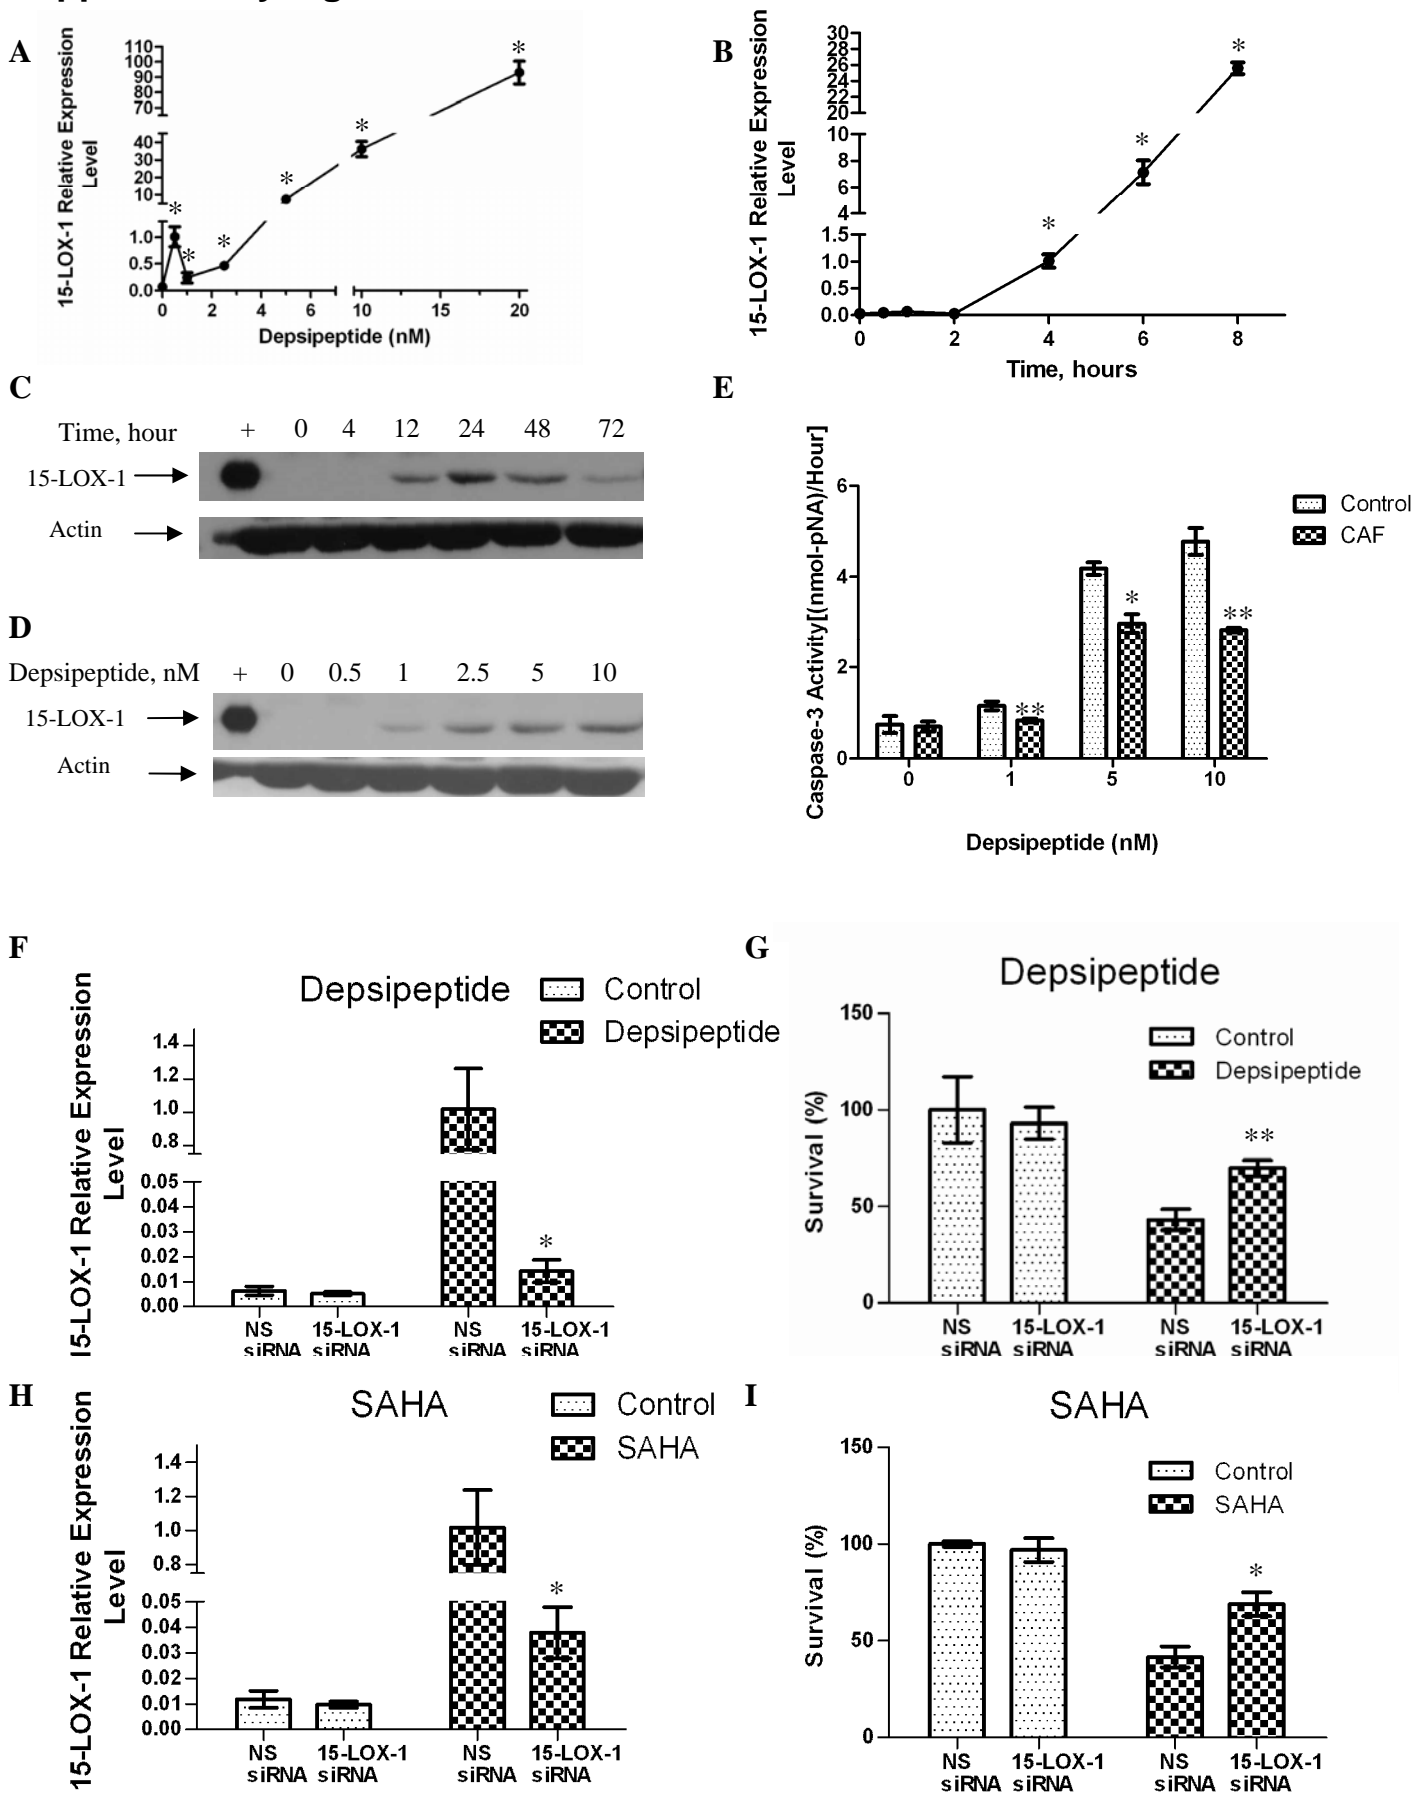

Supplementary Figure 1 legend in the next page.

Fig.1 HDAC1 and HDAC2 inhibition and 15-LOX-1 transcription activation. (A and B) Depsipeptide effects on 15-LOX-1 mRNA expression in SW480 colon cancer cells. SW480 cells were treated with depsipeptide at various concentrations (0-20 nM) for 24 hours (A) and for different time periods (B) at a concentration of 5 nM, and 15-LOX-1 mRNA expression was measured with real-time PCR. The relative expression levels were calculated as the values relative to that of the calibrator sample (time point or concentration 0). Values are the means  $\pm$  SDs of triplicate experiments. (C and D) Depsipeptide induction of 15-LOX-1 protein expression in SW480 cancer cells. SW480 cells were treated for various times (at 5 nM depsipeptide concentration, Fig. 1C) and with various concentrations (for 24 h. Fig. 1D) as indicated and processed for 15-LOX-1 Western blotting. + indicates positive control (HCT-116 cells transfected with a 15-LOX-1 expression vector). (E) Effects of 15-LOX-1 enzymatic activity on depsipeptide-induced apoptosis in SW480 cancer cells. SW480 cells treated with various depsipeptide concentrations, as indicated, were cultured with or without caffeic acid (CAF) at the 2.2  $\mu$ M concentration that specifically inhibits 15-LOX-1 enzymatic activity. Apoptosis was assessed by measuring caspase 3 activity levels. Values are the means  $\pm$  SDs of triplicate measurements. F-I. Effects of 15-LOX-1 downregulation on depsipeptide- and SAHA- induced survival inhibition in colon cancer cells. SW480 colon cancer cells were transfected with a pool of four siRNA duplexes for 15-LOX-1 or nonspecific siRNA sequence (NS siRNA). 24 h later, they were treated with either (F and G) depsipeptide (5 nM) or (H and I) SAHA (1 $\mu$ M). Control indicates vehicle-solvent treated cells. 48 h later, 15-LOX-1 mRNA was measured by real-time PCR (depsipeptide [F], SAHA treatment [H]). G and I. Cell survival was assessed by SRB assays 72 h after treatment. Values are presented as the survival percentages relative to control (solvent)-treated cells transfected with nonspecific siRNA. Values shown are the means  $\pm$  SDs of triplicate measurements.\*  $P < 0.0001$ ; \*\*  $P < 0.005$ .

**Supplementary Figure 2**

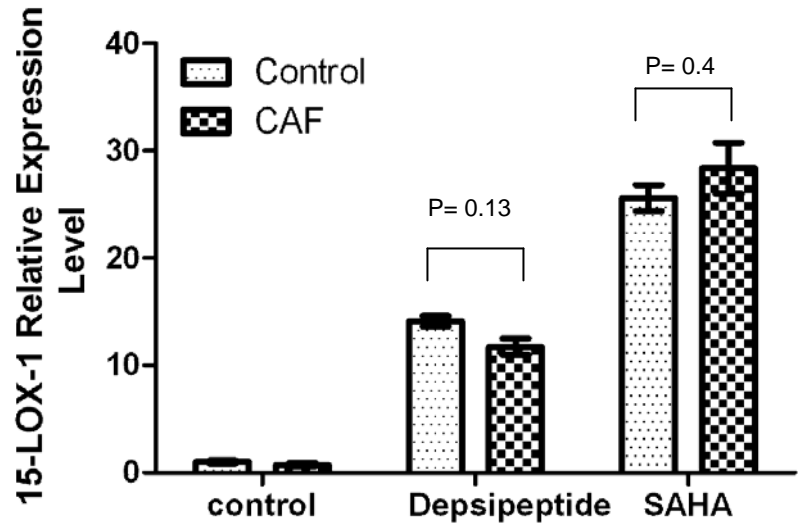

Fig.2 Caffeic acid effects on 15-LOX-1 transcription activation by depsipeptide. Caco-2 cells were treated with either depsipeptide (5nM) or SAHA (1 μM) with or without caffeic acid (CAF) at the 2.2 μM for 24 hours prior to measuring 15-LOX-1 mRNA expression by real-time PCR.

**Supplementary Figure 3**

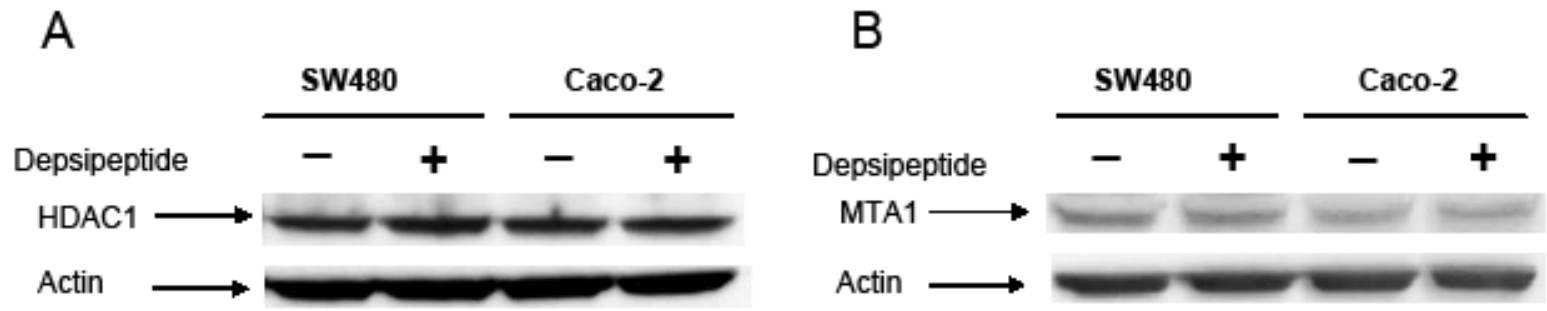

Fig. 3. Effects of depsipeptide on HDAC1 and MTA1 protein expression in colon cancer cells. Caco-2 and SW480 colon cancer cells were treated with depsipeptide and then harvested at 15 min (Caco-2) and 3.5 h (SW480) (same time points for ChIP/real-time PCR measurements for Fig. 4A and B). HDAC1 (A) and MTA1 (B) protein expression levels were measured by Western blotting. (+) indicates depsipeptide-treated cells. Control cells (-) were treated with the vehicle solvent for depsipeptide.

## Normal

## Tumor

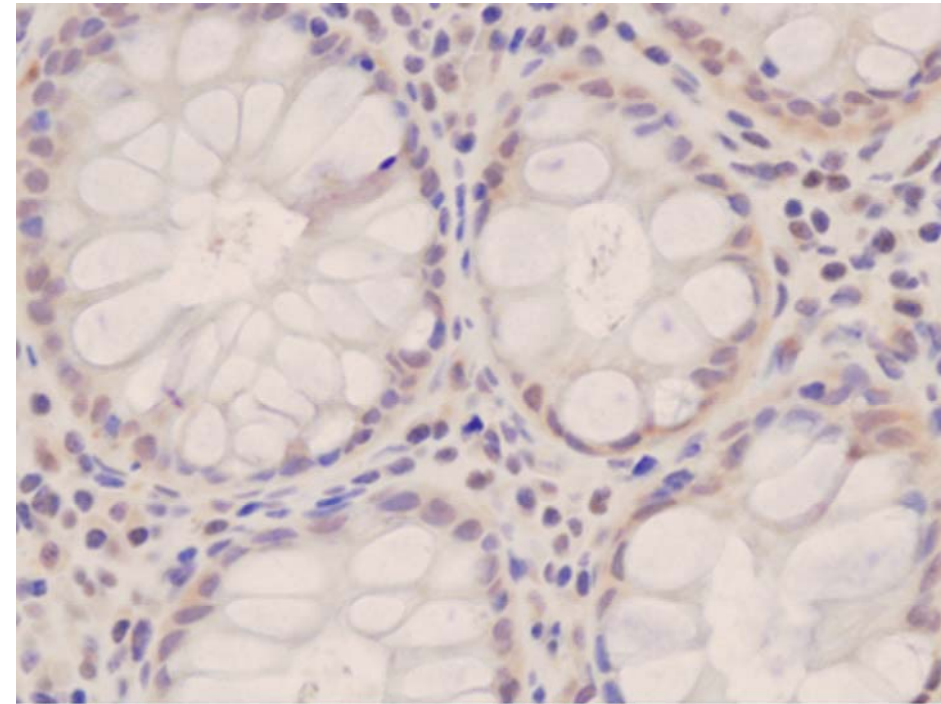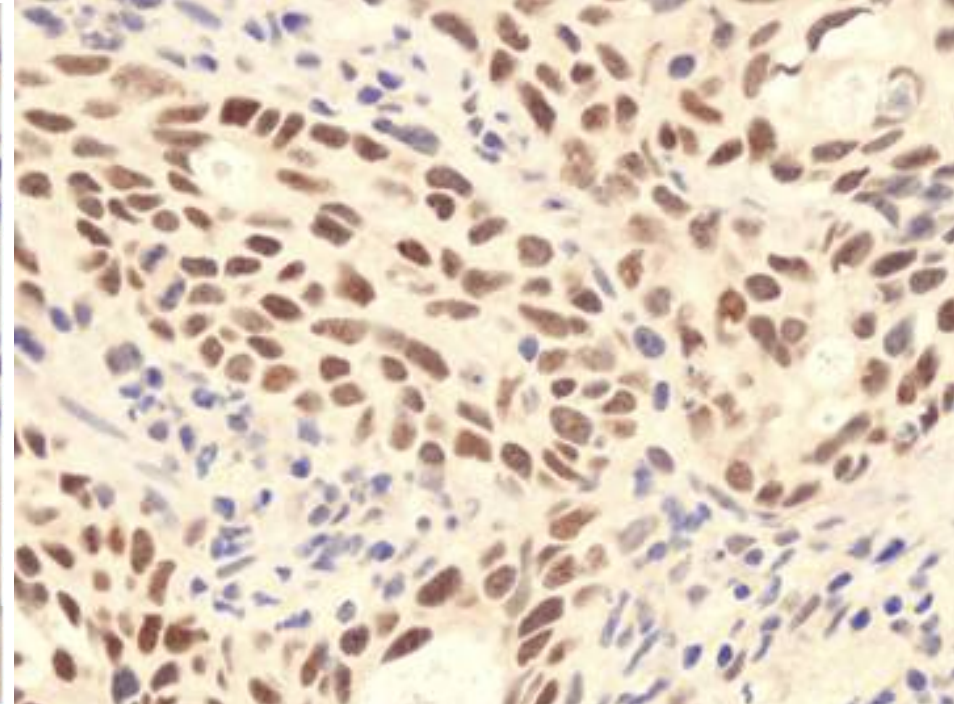

Fig.4 MTA-1 expression in normal and colorectal cancer tissues. A) Paired normal and colorectal cancer tissues that were immunohistochemically stained for expression of MTA-1. MTA-1 nuclear staining is shown in brown. (magnification  $\times 400$ ).
